# Supplementary material for: Phenology, fluxes and their drivers in major Indian agroecosystems: A modeling study using the Community Land Model (CLM5)
Source: Copernicus journal article supplement (doi:10.5194/egusphere-2025-1987), 2025-06-11
Supplement: Supplementary file 1 [file egusphere-2025-1987-supplement.pdf]

Supplement to,

## **Trends in crop phenology and terrestrial fluxes in major Indian agroecosystems using Community Land Model (CLM5)**

K. N. Reddy and S. Baidya Roy

### **Text S1: Carbon fluxes in CLM5 for C3 crops**

Photosynthesis in C<sub>3</sub> plants is based on the model of Farquhar et al. (1980). In its simplest form, leaf net photosynthesis after accounting for dark respiration ( $R_d$ ) is:

$$A_n = \min(A_c, A_j, A_p) - R_d$$

$$A_c = \frac{V_{c\max}(c_i - \Gamma)}{c_i + K_c(1 + o_i/K_o)}$$

$$A_j = \frac{J_x(c_i - \Gamma)}{4c_i + 8\Gamma}$$

$$A_p = 3T_p$$

where  $A_c$  ( $\mu\text{ mol CO}_2\text{ m}^{-2}\text{ s}^{-1}$ ) is the RuBP carboxylase (Rubisco) limited rate of carboxylation,  $A_j$  ( $\mu\text{ mol CO}_2\text{ m}^{-2}\text{ s}^{-1}$ ) is the maximum rate of carboxylation allowed by the capacity to regenerate RuBP (i.e., the light-limited rate), and  $A_p$  ( $\mu\text{ mol CO}_2\text{ m}^{-2}\text{ s}^{-1}$ ) is the product-limited rate of carboxylation for C<sub>3</sub> plants. In these equations,  $c_i$  is the internal leaf CO<sub>2</sub> partial pressure (Pa), and  $o_i = 0.20P_{\text{atm}}$  is the O<sub>2</sub> partial pressure (Pa).  $K_c$  and  $K_o$  are the Michaelis-Menten constants (Pa) for CO<sub>2</sub> and O<sub>2</sub>.  $\Gamma$  (Pa) is the CO<sub>2</sub> compensation point.  $V_{c\max}$  is the maximum rate of carboxylation ( $\mu\text{mol m}^{-2}\text{ s}^{-1}$ ), and  $J_x$  is the electron transport rate ( $\mu\text{mol m}^{-2}\text{ s}^{-1}$ ).  $T_p$  is the triose phosphate utilization rate ( $\mu\text{mol m}^{-2}\text{ s}^{-1}$ ), taken as  $T_p = 0.167V_{c\max}$  so that  $A_p = 0.5V_{c\max}$  for C<sub>3</sub> plants (as in Collatz et al. 1992). For more details on the calculation of  $V_{c\max}$ ,  $J_x$ ,  $T_p$ ,  $K_c$ ,  $K_o$ , and  $\Gamma$  at various temperatures, please refer to CLM5 Tech Note: Chapter 9, and for information on respiration, refer to CLM5 Tech Note: Chapter 17 (Lawrence et al., 2018).

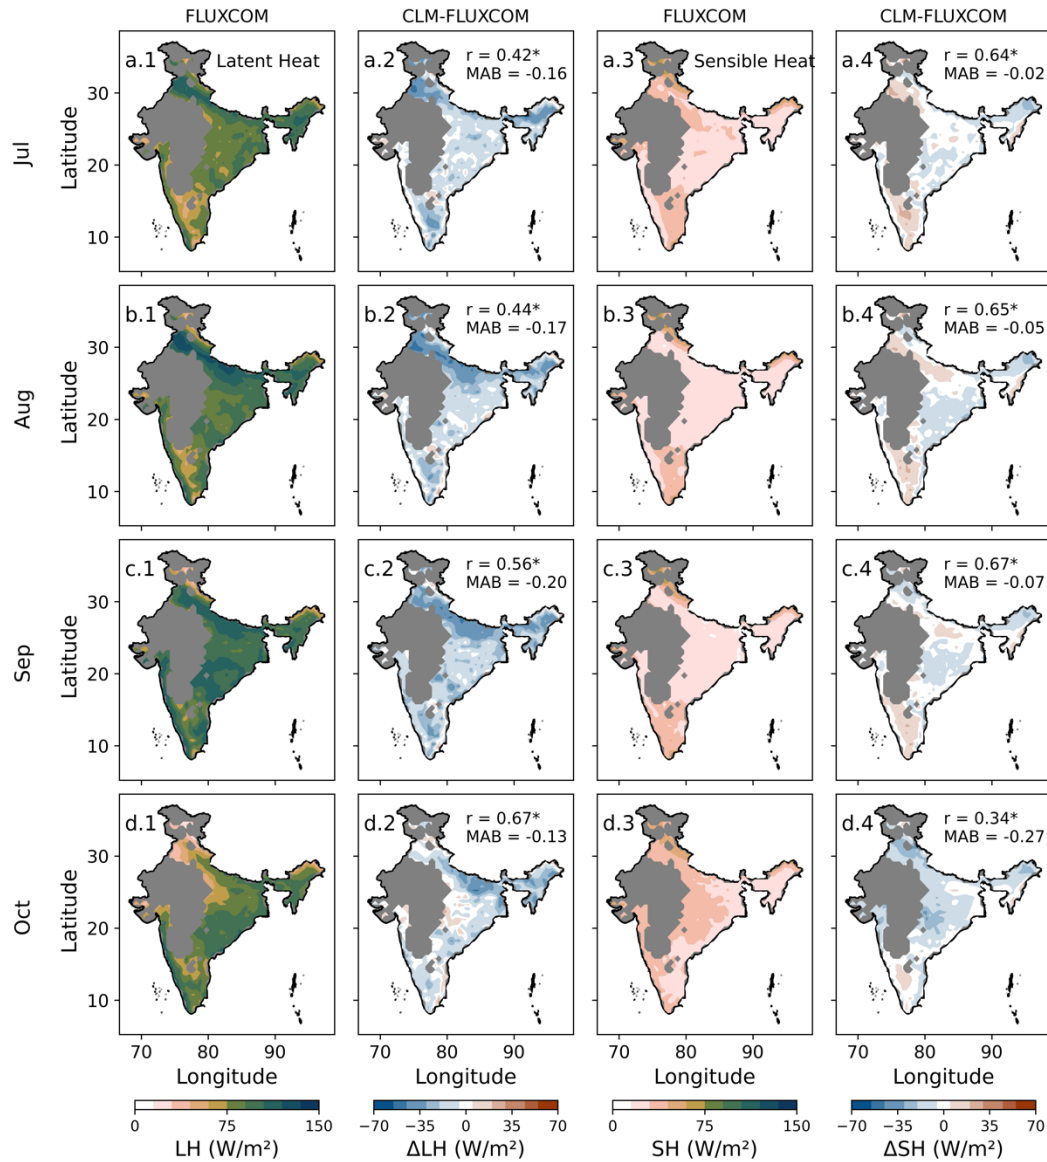

**Figure S1: Comparison of monthly water and energy fluxes simulated by CLM5 CTRL run against the FLUXCOM data during the rice growing season, July to October. The area shown here is a region with more than 10% of the land area covered by rice. The second and fourth columns show the difference between CLM5 and FLUXCOM latent and sensible heat, respectively. The monthly mean fluxes over the period 1970-2014 are shown here. Pearson  $r$  in the plots is tested for significance, and values that are significant have an asterisk ‘\*’.**

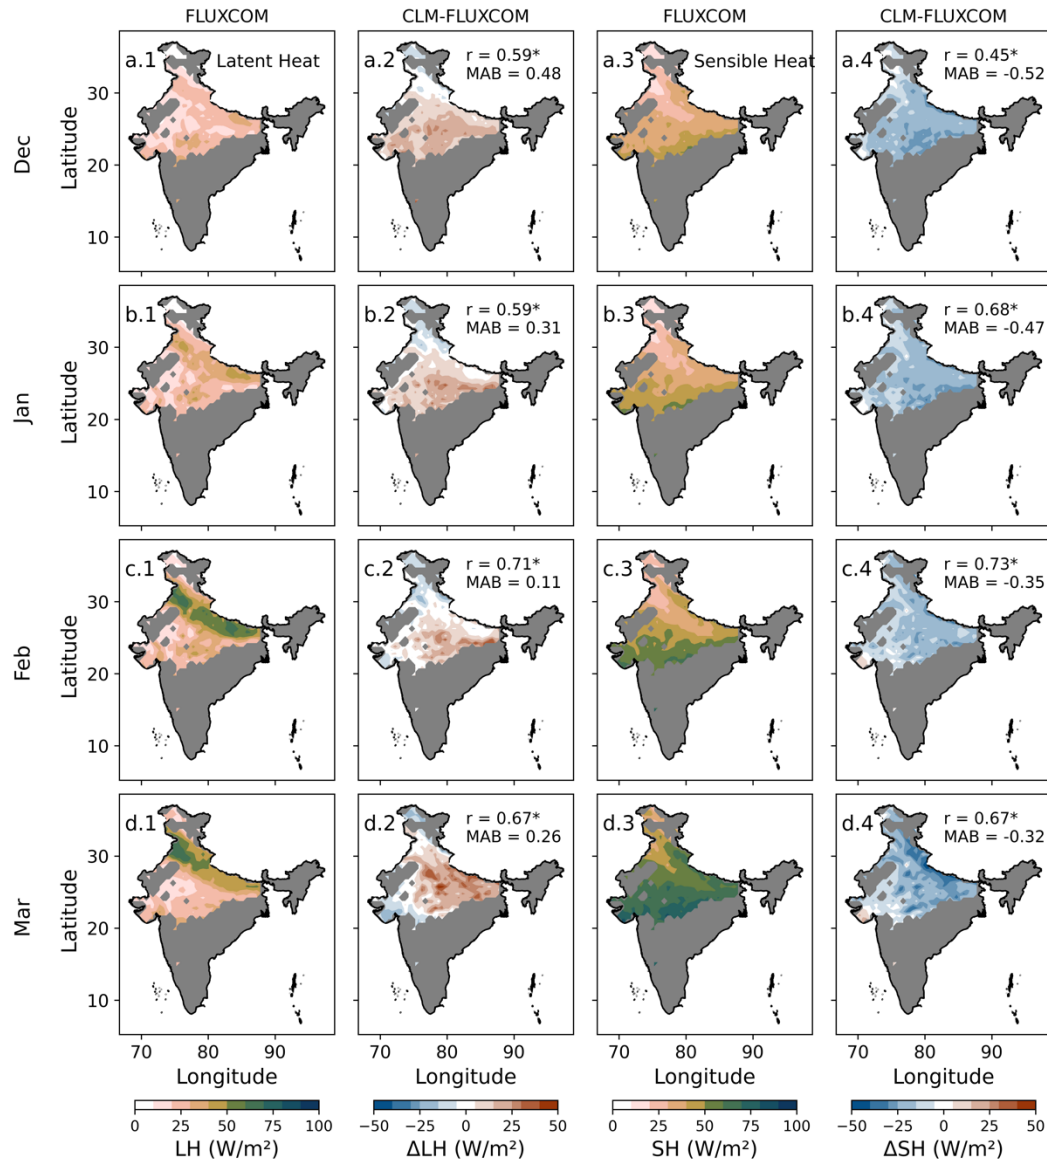

**Figure S2: Comparison of monthly water and energy fluxes simulated by CLM5 CTRL run against the FLUXCOM data during the wheat growing season, December to March. The area shown here is a region with more than 10% of the land area covered by wheat. The second and fourth columns show the difference between CLM5 and FLUXCOM latent and sensible heat, respectively. The monthly mean fluxes over the period 1970-2014 are shown here. Pearson  $r$  in the plots is tested for significance, and values that are significant have an asterisk “\*”.**

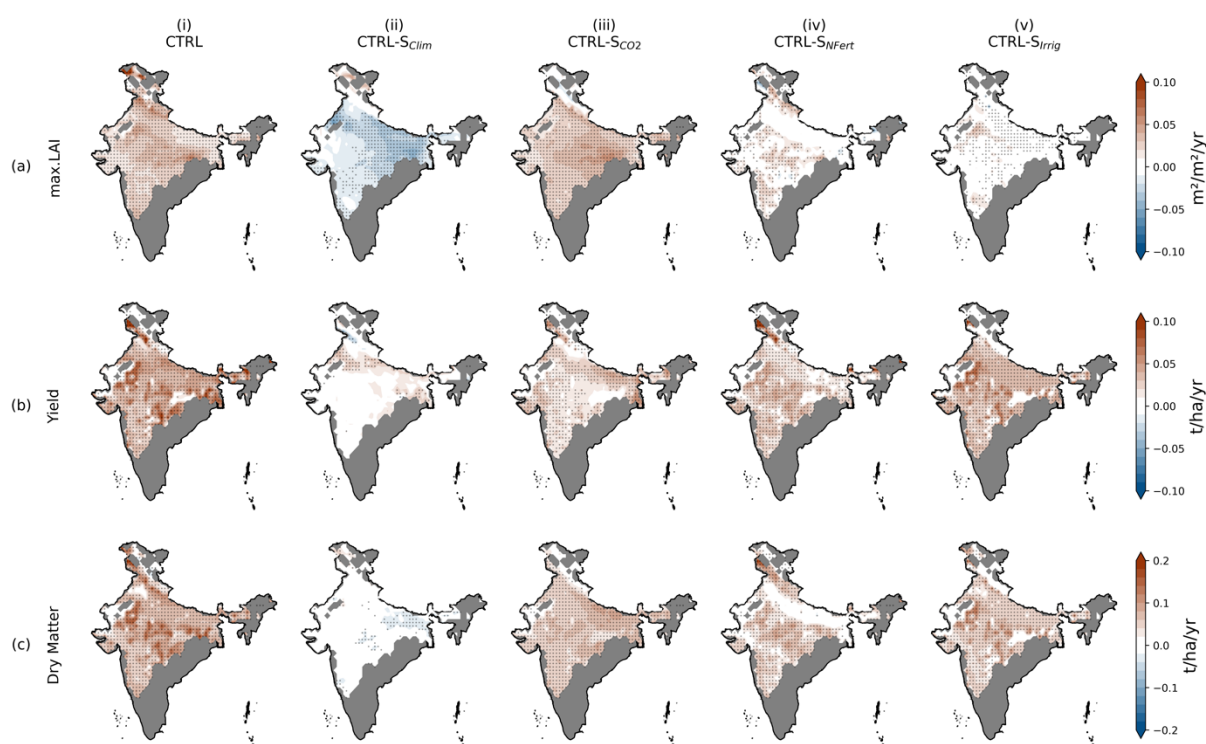

**Figure S3:** Spatial trend observed in (a) max. LAI, (b) Yield, and (c) Dry Matter of wheat-growing regions in the (i) CTRL simulation. (ii) to (v) shows the impact of each driver. Regions stippled implies the trend is statistically significant at  $p < 0.05$ .

**Table S1:** Comparing GPP simulated by CLM5 for rice and wheat against other studies

|              | Location                                                       | GPP (gC/m²)         | AR/GPP               | Reference                 |
|--------------|----------------------------------------------------------------|---------------------|----------------------|---------------------------|
| <b>Rice</b>  | International Rice Research Institute, Philippines             | 1192<br>1464        | 0.67                 | Alberto et al., 2009      |
|              | Mase paddy site, Japan                                         | 1140                | 0.65                 | Saito et al., 2005        |
|              | Central Rice Research Institute, Cuttak, India                 | 811                 | 0.44                 | Bhattacharya et al., 2013 |
|              | Bangladesh Agricultural University Farmland, Dhaka, Bangladesh | 1312<br>1574        | 0.58<br>0.52         | Hossen et al., 2011       |
|              | North China Plain, China                                       | 987<br>966          | 0.56<br>0.56         | Chen et al., 2015         |
|              | Indian Agricultural Research Institute, New Delhi, India       | 753                 | 0.51                 | Kumar et al., 2021        |
|              | Rice growing region of India                                   | 1528.3 ± 561        | 0.53 ± 0.05          | This study                |
|              | Selhausen test site, Germany (First Year)                      | 1304                | 0.51                 | Schmidt et al., 2012      |
| <b>Wheat</b> | Selhausen test site, Germany (Second Year)                     | 1067                | 0.49                 | Schmidt et al., 2012      |
|              | North China Plain, China                                       | 1220<br>1135<br>859 | 0.52<br>0.54<br>0.53 | Chen et al., 2015         |
|              | Saharanpur, India                                              | 1024                | -                    | Patel et al., 2021        |
|              | Indian Agricultural Research Institute, New Delhi, India       | 888                 | 0.34                 | Kumar et al., 2021        |
|              | Wheat growing regions of India                                 | 862.6 ± 438.6       | 0.42 ± 0.04          | This study                |

## References:

- Alberto, M. C. R., Wassmann, R., Hirano, T., Miyata, A., Kumar, A., Padre, A., and Amante, M.: CO<sub>2</sub>/heat fluxes in rice fields: Comparative assessment of flooded and non-flooded fields in the Philippines, *Agr. Forest Meteorol.*, 149, 1737–1750, <https://doi.org/10.1016/j.agrformet.2009.06.003>, 2009.
- Bhattacharyya P., Neogi S., Roy K. S., Dash P. K., Tripathi R., and Rao K. S.: Net ecosystem CO<sub>2</sub> exchange and carbon cycling in tropical lowland flooded rice ecosystem. *Nutr. Cycl. Agroecosyst.*, 95:133–144, <https://doi.org/10.1007/s10705-013-9553-1>, 2013.
- Chen, C., Dan, L.I., Zhiqiu, G., Tang, J., Xiaofeng, G., Linlin, W., and Bingcheng, W.: Seasonal and interannual variations of carbon exchange over a rice-wheat rotation system on the north china plain, *Advan. Atmos. Sci.*, 32, 1365–1380, <https://doi.org/10.1007/s00376-015-4253-1>, 2015.
- Farquhar, G.D., von Caemmerer, S.V. and Berry, J.A.: A biochemical model of photosynthetic CO<sub>2</sub> assimilation in leaves of C<sub>3</sub> species. *planta*, 149, pp.78-90, <https://doi.org/10.1007/BF00386231>, 1980.
- Hossen, M. S., Mano, M., Miyata, A., Baten, M. A., and Hiyama, T.: Seasonality of ecosystem respiration in a double-cropping paddy field in Bangladesh, *Biogeosciences Discuss.*, 8, 8693–8721, <https://doi.org/10.5194/bgd-8-8693-2011>, 2011.
- Kumar, A., Bhatia, A., Sehgal, V. K., Tomer, R., Jain, N., and Pathak, H.: Net Ecosystem Exchange of Carbon Dioxide in Rice-Spring Wheat System of Northwestern Indo-Gangetic Plains, *Land*, 10, 701, <https://doi.org/10.3390/land10070701>, 2021.
- Lawrence, D. M., Fisher, R., Koven, C., Oleson, K., Svenson, S., Vertenstein, M. (coordinating lead authors), Andre, B., Bonan, G., Ghimire, B., van Kampenhout, L., Kennedy, D., Kluzek, E., Knox, R., Lawrence, P., Li, F., Li, H., Lombardozzi, D., Lu, Y., Perket, J., Riley, W., Sacks, W., Shi, M., Wieder, W., Xu, C. (lead authors), Ali, A., Badger, A., Bisht, G., Broxton, P., Brunke, M., Buzan, J., Clark, M., Craig, T., Dahlin, K., Drewniak, B., Emmons, L., Fisher, J., Flanner, M., Gentine, P., Lenaerts, J., Levis, S., Leung, L. R., Lipscomb, W., Pelletier, J., Ricciuto, D., M., Sanderson, B., Shuman, J., Slater, A., Subin, Z., Tang, J., Tawfik, A., Thomas, Q., Tilmes, S., Vitt, F., and Zeng, X.: Technical Description of version 5.0 of the Community Land Model (CLM), Natl. Cent. Atmospheric Res. (NCAR), available at [http://www.cesm.ucar.edu/models/cesm2/land/CLM50\\_Tech\\_Note.pdf](http://www.cesm.ucar.edu/models/cesm2/land/CLM50_Tech_Note.pdf) (last access: 08 July 2024), 2018.
- Patel, N. R., Pokhariyal, S., Chauhan, P., and Dadhwal, V. K.: Dynamics of CO<sub>2</sub> fluxes and controlling environmental factors in sugarcane (C<sub>4</sub>)–wheat (C<sub>3</sub>) ecosystem of dry sub-humid region in India, *Int. J. Biometeorol.*, 65, 1069–1084, <https://doi.org/10.1007/s00484-021-02088-y>, 2021.
- Saito, M., Miyata, A., Nagai, H. and Yamada, T.: Seasonal variation of carbon dioxide exchange in rice paddy field in Japan. *Agric. For. Meteorol.*, 135(1-4), pp.93-109, <https://doi.org/10.1016/j.agrformet.2005.10.007>, 2005.
- Schmidt, M., Reichenau, T.G., Fiener, P. and Schneider, K.: The carbon budget of a winter wheat field: An eddy covariance analysis of seasonal and inter-annual variability, *Agric. For. Meteorol.*, 165, pp.114-126, <https://doi.org/10.1016/j.agrformet.2012.05.012>, 2012.
